# Supplementary material for: 18F-Labelling of electron rich iodonium ylides: application to the radiosynthesis of potential 5-HT2A receptor PET ligands
Source: Royal Society of Chemistry journal article supplement (doi:10.1039/c7ob00628d), 2017-01-01

## **<sup>18</sup>F labelling of electron rich iodonium ylides: Application to the radiosynthesis of potential 5-HT<sub>2A</sub> receptor PET ligands.**

Ida Nymann Petersen<sup>a</sup>, Jonas Villadsen<sup>b</sup> Hanne Demant Hansen<sup>b</sup>, Jakob Madsen<sup>c</sup>, Anders A. Jensen<sup>a</sup>, Nic Gillings<sup>c</sup>, Szabolcs Lehel<sup>c</sup>, Matthias M. Herth<sup>a</sup>, Gitte Knudsen<sup>b</sup> and Jesper L. Kristensen<sup>\*a</sup>

*a* Department of Drug Design and Pharmacology, Faculty of Health and Medical Sciences, University of Copenhagen, Universitetsparken 2, 2100 Copenhagen, Denmark

*b* Center for Integrated Molecular Brain Imaging, Rigshospitalet and University of Copenhagen, Blegdamsvej 9, 2100 Copenhagen, Denmark.

*c* PET and Cyclotron Unit, Rigshospitalet, Blegdamsvej 9, 2100 Copenhagen, Denmark. †

### **Table of contents**

|                                                   |     |
|---------------------------------------------------|-----|
| PDSP data, binding affinities and functional data | S1  |
| Copies of radio HPLCs                             | S3  |
| Copies of H and C NMR                             | S12 |

### **PDSP screening of 2**

| <b>Target</b>      | <b>Ki (nM)</b> |
|--------------------|----------------|
| 5-HT <sub>1A</sub> | 644            |
| 5-HT <sub>2A</sub> | 1.3            |
| 5-HT <sub>2B</sub> | 3              |
| 5-HT <sub>2C</sub> | 5.4            |
| 5-HT <sub>5A</sub> | 3425           |
| 5-HT <sub>6</sub>  | 36             |
| Alpha 1A           | 1392.5         |
| Alpha 2A           | 174            |
| Alpha 2B           | 411            |
| Alpha 2C           | 33             |
| D2                 | 2530           |
| D3                 | 491            |
| D4                 | 208            |
| DAT                | 1858           |
| H1                 | 27             |

## Binding affinities

| Compound | K <sub>i</sub> (nM) |                    |                                                            |
|----------|---------------------|--------------------|------------------------------------------------------------|
|          | 5-HT <sub>2A</sub>  | 5-HT <sub>2C</sub> | K <sub>i</sub> <sup>2C</sup> /K <sub>i</sub> <sup>2A</sup> |
| <b>1</b> | 0.21                | 3.1                | 15                                                         |
| <b>2</b> | 0.95                | 9.9                | 10                                                         |
| <b>3</b> | 7.2                 | 240                | 33                                                         |
| <b>4</b> | 1.7                 | 83                 | 49                                                         |

Binding affinities of **1** and analogs in a [<sup>3</sup>H]Cimbi-36 competition binding assay using membranes from tsA201 cells transiently expressing human 5-HT<sub>2A</sub> and 5-HT<sub>2C</sub> receptors. The K<sub>i</sub> values for the compounds are given in nM.

## Functional data for tested compounds

| Compound    | pEC <sub>50</sub>  |                    | selectivity | % R <sub>max</sub> |                    |
|-------------|--------------------|--------------------|-------------|--------------------|--------------------|
|             | 5-HT <sub>2A</sub> | 5-HT <sub>2C</sub> |             | 5-HT <sub>2A</sub> | 5-HT <sub>2C</sub> |
| <b>2</b>    | 8.55±0.13          | 7.87±0.06          | 4.6         | 63±6               | 85±2               |
| <b>3</b>    | 8.45±0.14          | 7.66±0.08          | 6           | 67±5               | 80±3               |
| <b>4</b>    | 7.91±0.08          | 6.52±0.08          | 25          | 46±2               | 48±2               |
| <b>5-HT</b> | 8.35±0.02          | 8.81±0.05          | 3           | 100                | 100                |

Stable h5-HT<sub>2A</sub><sup>-</sup> and h5-HT<sub>2C</sub>-HEK293 cell lines were used in the Ca<sup>2+</sup>/Fluo-4/assay. The EC<sub>50</sub> values (given in nM with pEC<sub>50</sub> ± S.E.M. values) and R<sub>max</sub> ± S.E.M. values (given in % of the maximal response evoked by 5-HT at the receptor) are based on 3 independent experiments.

### **Analytical identification**

Analytical method A: LUNA (Phenomenex), 5u, C18(2) 100a, 150X4.6 mm. 33 % ACN in 0,1 % H<sub>3</sub>PO<sub>4</sub> 1,5 ml/min

Analytical method B: Kintex (Phenomenex), 2.6, C18, 100A, 50x4.6 mm. 33 % ACN in 0,1 % H<sub>3</sub>PO<sub>4</sub> 1,5 ml/min

Analytical method C: LUNA (Phenomenex), 5u, C18(2) 100a, 150X4.6 mm. 20 % ACN in 25mM citric acid 1,5 ml/min

[<sup>18</sup>F]8

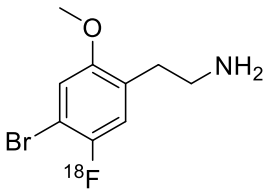

Labeled using general procedure A

RCC TLC (EtOAc) of the Boc protected: 60 %, 79 %, 63 %, 85 %, 69 %, 87 %, 80 %, 70 %

Chromatogram: F-18

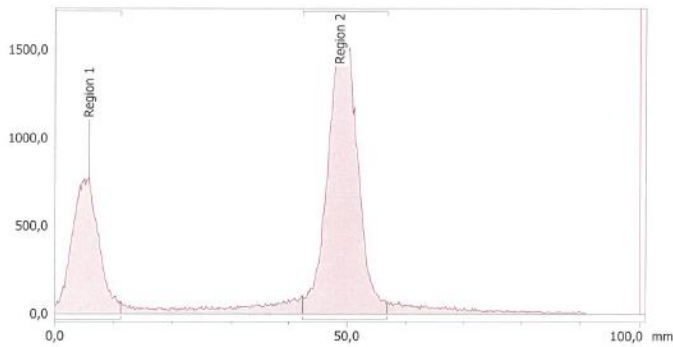

Regions: F-18

| Name     | Start (mm) | End (mm) | Retention (RF) | Area (Counts) | %ROI (%) | %Total (%) |
|----------|------------|----------|----------------|---------------|----------|------------|
| Region 1 | 0,0        | 11,2     | 0,058          | 20421,0       | 30,00    | 25,96      |
| Region 2 | 42,4       | 56,8     | 0,488          | 47658,0       | 70,00    | 60,58      |
| 2 Peaks  |            |          |                | 68079,0       | 100,00   | 86,54      |

Total Area: 78669,0 Counts

Analytical method C: 9 min 24 sec

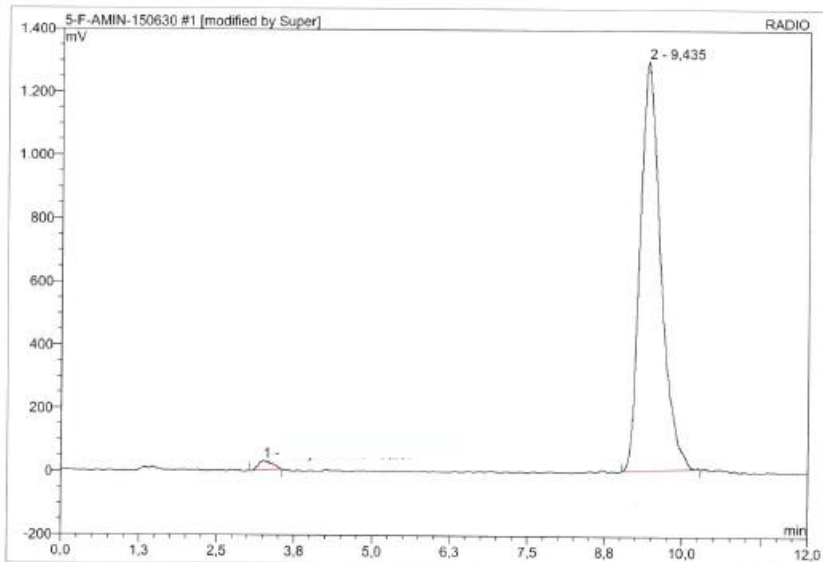

| No.    | Ret.Time min | Peak Name | Area mV*min | Rel.Area % | Amount | Type |
|--------|--------------|-----------|-------------|------------|--------|------|
| 1      | 3,26         |           | 7,610       | 1,51       | n.a.   | BMB* |
| 2      | 9,44         | n.a.      | 496,360     | 98,49      | n.a.   | BMB* |
| Total: |              |           | 1325,077    |            | 0,000  |      |

[<sup>18</sup>F]2

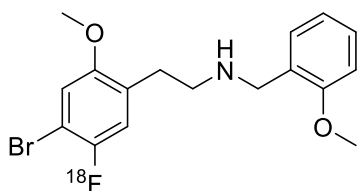

Via general procedure B via [<sup>18</sup>F]4  
 Preparative: retention time 18 min 20 sec  
 Analytical A: 6 min 42 sec (not shown)  
 Analytical B: 2 min 33 sec  
 SA: 19 GBq/umol

|                  |                 |                   |        |
|------------------|-----------------|-------------------|--------|
| Sample Name:     | INP122-160920-1 | Injection Volume: | 100.0  |
| Vial Number:     | BA2             | Channel:          | Radio  |
| Sample Type:     | unknown         | Wavelength:       | n.a.   |
| Control Program: | Cimbi36         | Bandwidth:        | n.a.   |
| Quantif. Method: | CIMBI           | Dilution Factor:  | 1.0000 |
| Recording Time:  | 20/9/2016 14:02 | Sample Weight:    | 1.0000 |
| Run Time (min):  | 3.00            | Sample Amount:    | 1.0000 |

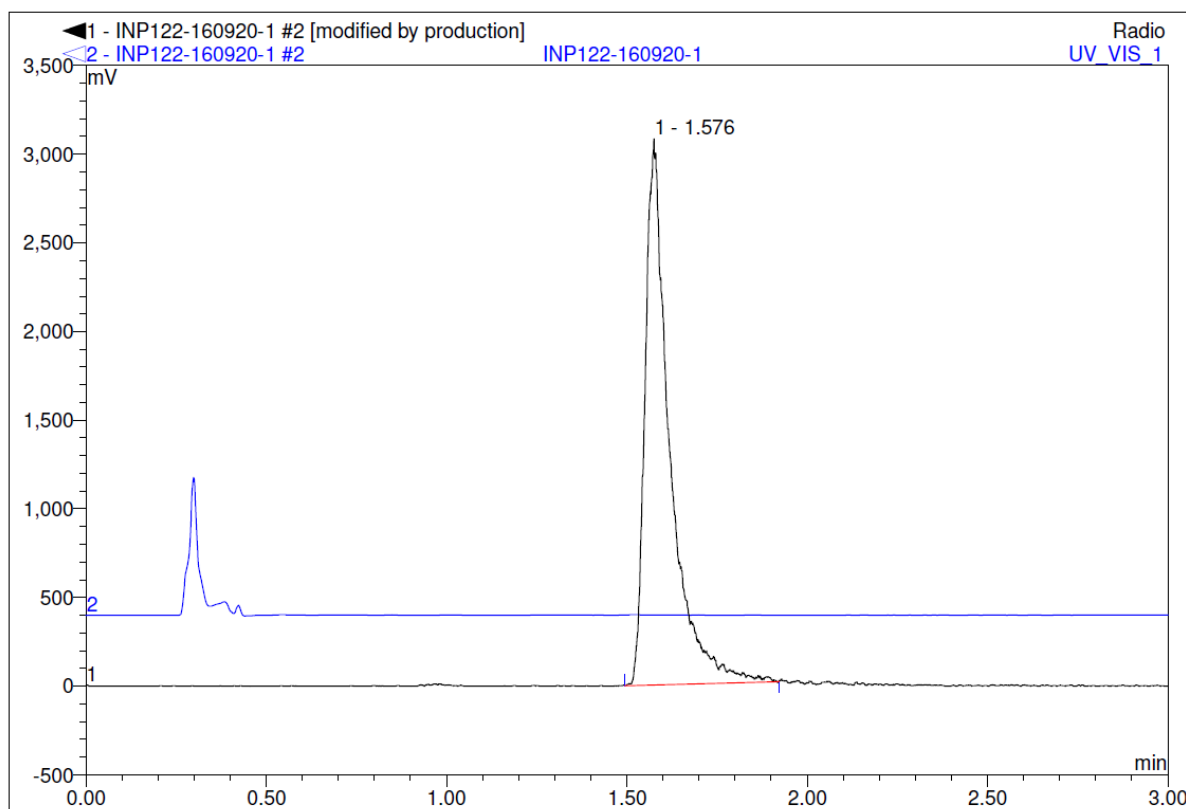

| No.           | Ret.Time min | Peak Name | Area mV*min | Rel.Area % | Amount mAUmin | Type |
|---------------|--------------|-----------|-------------|------------|---------------|------|
| 1             | 1.576        | n.a.      | 243.7671    | 100.00     | n.a.          | BMB* |
| <b>Total:</b> |              |           | 3079.300    |            | 0.000         |      |

|                  |                 |                   |                     |
|------------------|-----------------|-------------------|---------------------|
| Sample Name:     | INP122-160920-1 | Injection Volume: | 100.0               |
| Vial Number:     | BA3             | Channel:          | DecaycorrectedRadio |
| Sample Type:     | spiked          | Wavelength:       | n.a.                |
| Control Program: | Cimbi36         | Bandwidth:        | n.a.                |
| Quantif. Method: | CIMBI           | Dilution Factor:  | 1.0000              |
| Recording Time:  | 20/9/2016 14:11 | Sample Weight:    | 1.0000              |
| Run Time (min):  | 3.00            | Sample Amount:    | 1.0000              |

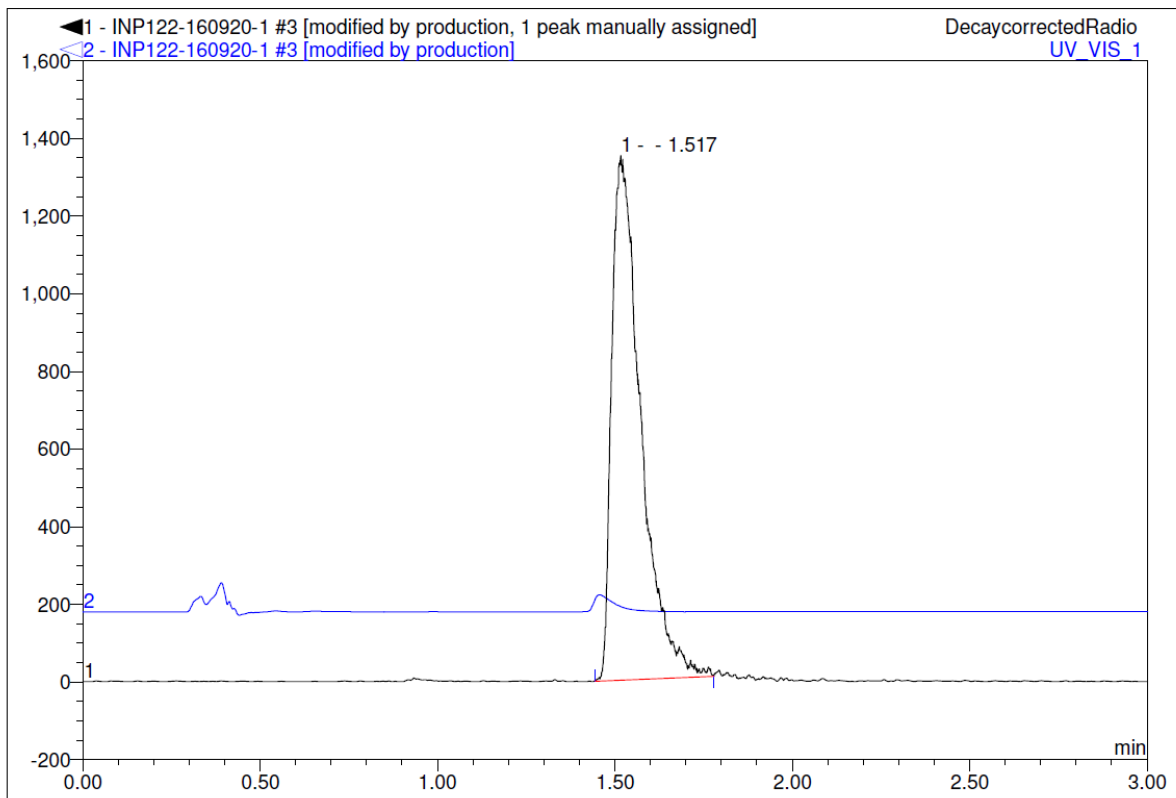

| No.           | Ret.Time min | Peak Name | Area *min | Rel.Area % | Amount mAUmin | Type  |
|---------------|--------------|-----------|-----------|------------|---------------|-------|
| 1             | 1.517        |           | 128.2688  | 100.00     | n.a.          | BMB*^ |
| <b>Total:</b> |              |           | 1352.213  |            | 0.000         |       |

[<sup>18</sup>F]3

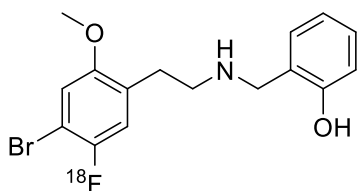

Using general procedure B via [<sup>18</sup>F]4  
 Preparative retention time: 9 min 31 sec  
 Analytical: 3 min 50 sec  
 SA: 21 GBq/umol

|                  |                                    |                   |                   |
|------------------|------------------------------------|-------------------|-------------------|
| Sample Name:     | cm-I327 33 %ACN in 0,1 % H3PO      | Injection Volume: | 50.0              |
| Vial Number:     | 6                                  | Channel:          | Decaycorrected11C |
| Sample Type:     | unknown                            | Wavelength:       | n.a.              |
| Control Program: | isocratic 100 % A, flow 1,5, 15 mi | Bandwidth:        | n.a.              |
| Quantif. Method: | AE105                              | Dilution Factor:  | 1.0000            |
| Recording Time:  | 25/8/2015 13:21                    | Sample Weight:    | 1.0000            |
| Run Time (min):  | 15.00                              | Sample Amount:    | 1.0000            |

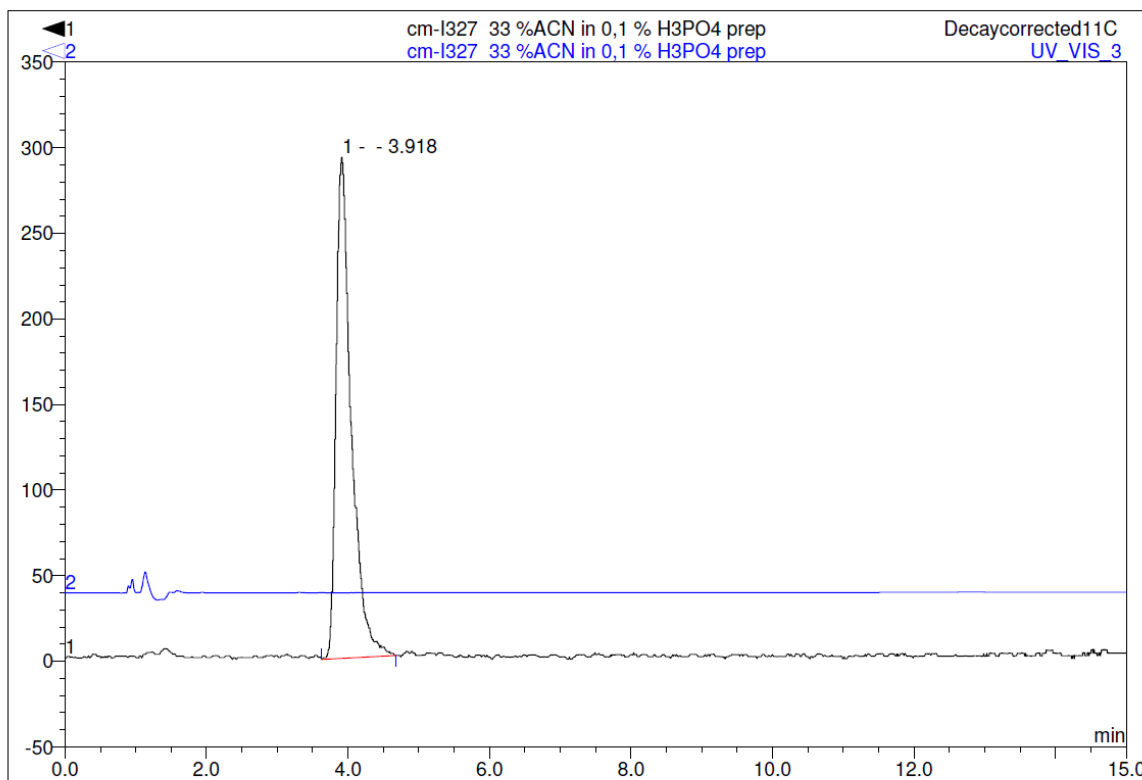

| No.           | Ret.Time min | Peak Name | Area *min | Rel.Area % | Amount | Type  |
|---------------|--------------|-----------|-----------|------------|--------|-------|
| 1             | 3.92         |           | 72.881    | 100.00     | n.a.   | BMB*^ |
| <b>Total:</b> |              |           | 292.587   |            | 0.000  |       |

|                  |                                    |                   |                   |
|------------------|------------------------------------|-------------------|-------------------|
| Sample Name:     | cm-I327 33 %ACN in 0,1 % H3PO      | Injection Volume: | 50.0              |
| Vial Number:     | 6                                  | Channel:          | Decaycorrected11C |
| Sample Type:     | spiked                             | Wavelength:       | n.a.              |
| Control Program: | isocratic 100 % A, flow 1,5, 15 mi | Bandwidth:        | n.a.              |
| Quantif. Method: | AE105                              | Dilution Factor:  | 1.0000            |
| Recording Time:  | 25/8/2015 14:10                    | Sample Weight:    | 1.0000            |
| Run Time (min):  | 15.00                              | Sample Amount:    | 1.0000            |

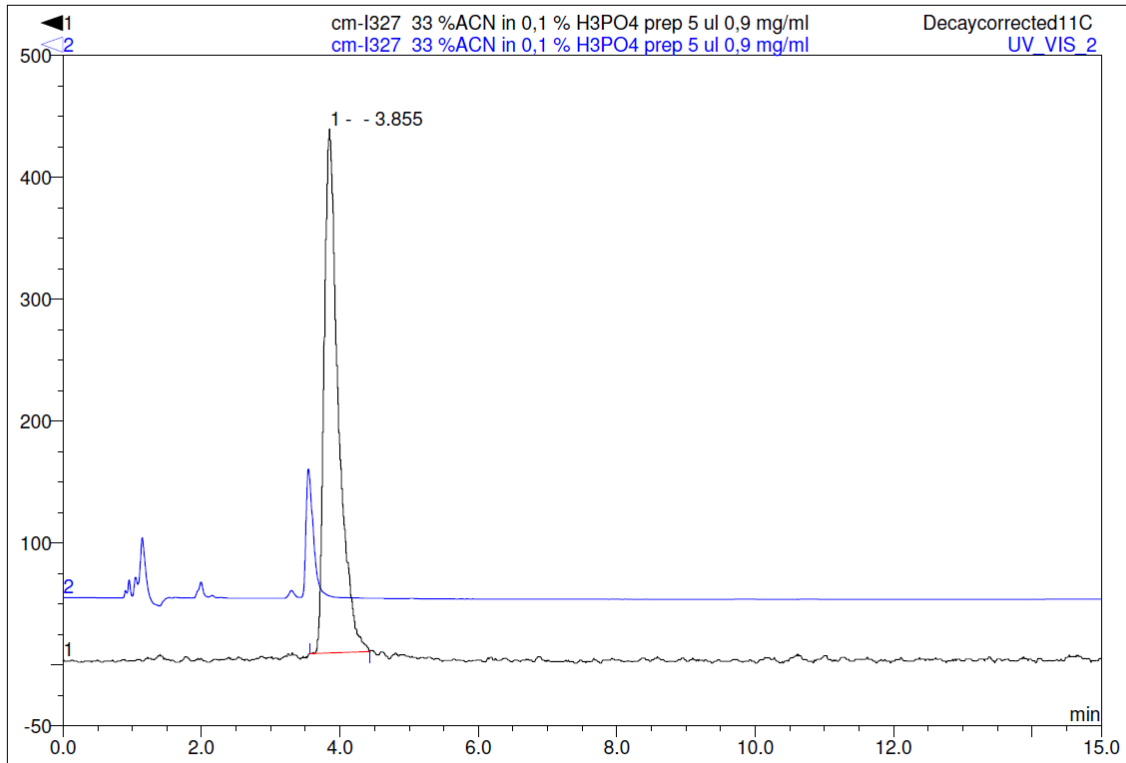

| No.           | Ret.Time<br>min | Peak Name | Area<br>*min | Rel.Area<br>% | Amount | Type  |
|---------------|-----------------|-----------|--------------|---------------|--------|-------|
| 1             | 3.86            |           | 102.266      | 100.00        | n.a.   | BMB*^ |
| <b>Total:</b> |                 |           | 429.910      |               | 0.000  |       |



[<sup>18</sup>F]4

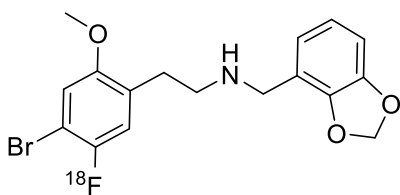

Direct labeling via general procedure A using  
RCC TLC (EtOAc) of the boc protected 75 %, 52 %, 56 %, 77 %  
Preparative retention time: 6 min 30 sec  
Analytical: 3 min 55 sec  
SA: 48 GBq/umol

Chromatogram: F-18

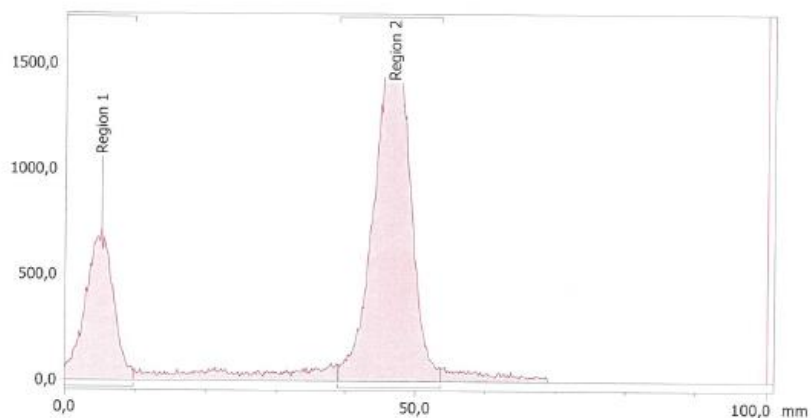

Regions: F-18

| Name     | Start (mm) | End (mm) | Retention (RF) | Area (Counts) | %ROI (%) | %Total (%) |
|----------|------------|----------|----------------|---------------|----------|------------|
| Region 1 | 0,0        | 9,8      | 0,052          | 16276,0       | 25,01    | 22,09      |
| Region 2 | 39,0       | 53,6     | 0,470          | 48792,0       | 74,99    | 66,23      |
| 2 Peaks  |            |          |                | 65068,0       | 100,00   | 88,32      |

Total Area: 73673,0 Counts  
Average Background: 0,0 Counts

|                  |                                    |                   |        |
|------------------|------------------------------------|-------------------|--------|
| Sample Name:     | cm-l368 deprotected prep 33 %A     | Injection Volume: | 50.0   |
| Vial Number:     | 3                                  | Channel:          | Radio  |
| Sample Type:     | unknown                            | Wavelength:       | n.a.   |
| Control Program: | isocratic 100 % A, flow 1,5, 15 mi | Bandwidth:        | n.a.   |
| Quantif. Method: | AE105                              | Dilution Factor:  | 1.0000 |
| Recording Time:  | 23/9/2015 16:08                    | Sample Weight:    | 1.0000 |
| Run Time (min):  | 10.35                              | Sample Amount:    | 1.0000 |

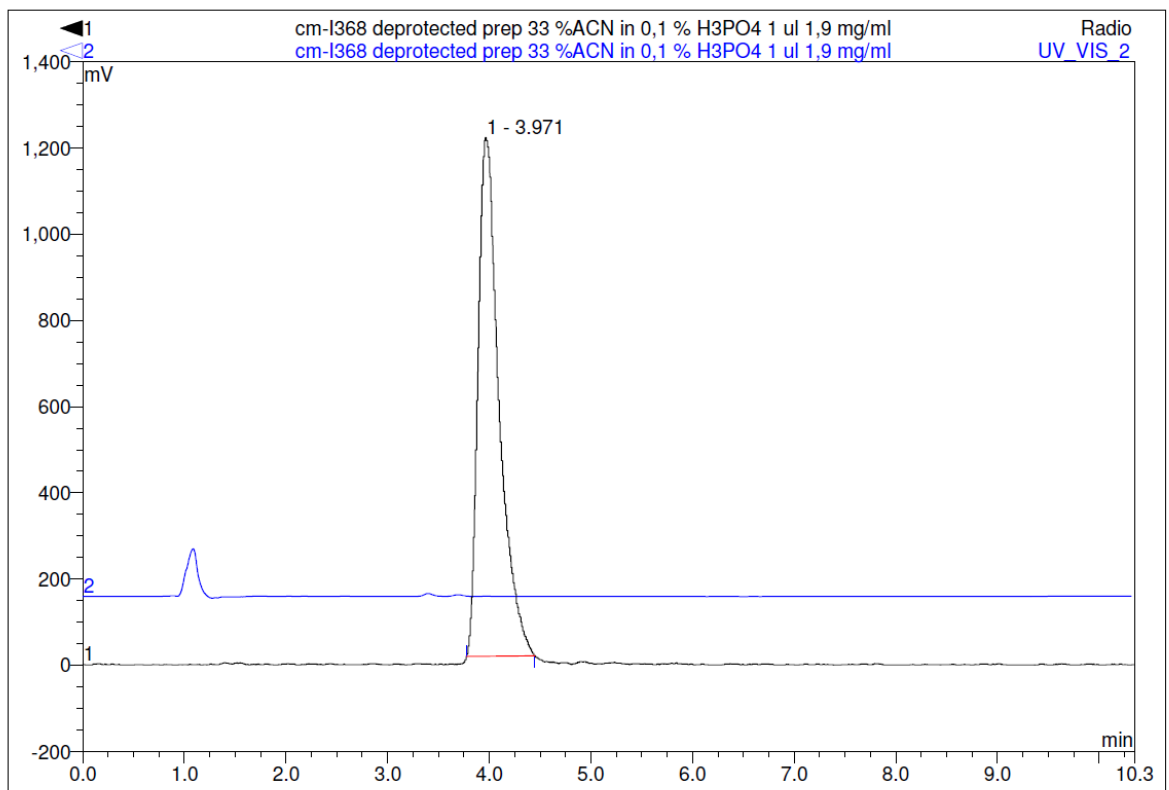

| No.           | Ret.Time<br>min | Peak Name | Area<br>mV*min | Rel.Area<br>% | Amount | Type |
|---------------|-----------------|-----------|----------------|---------------|--------|------|
| 1             | 3.97            | n.a.      | 288.668        | 100.00        | n.a.   | BMB  |
| <b>Total:</b> |                 |           | 1203.116       |               | 0.000  |      |

|                  |                                    |                   |                   |
|------------------|------------------------------------|-------------------|-------------------|
| Sample Name:     | cm-I368 deprotected 33 %ACN in     | Injection Volume: | 50.0              |
| Vial Number:     | 3                                  | Channel:          | Decaycorrected11C |
| Sample Type:     | spiked                             | Wavelength:       | n.a.              |
| Control Program: | isocratic 100 % A, flow 1,5, 15 ml | Bandwidth:        | n.a.              |
| Quantif. Method: | AE105                              | Dilution Factor:  | 1.0000            |
| Recording Time:  | 23/9/2015 16:20                    | Sample Weight:    | 1.0000            |
| Run Time (min):  | 11.89                              | Sample Amount:    | 1.0000            |

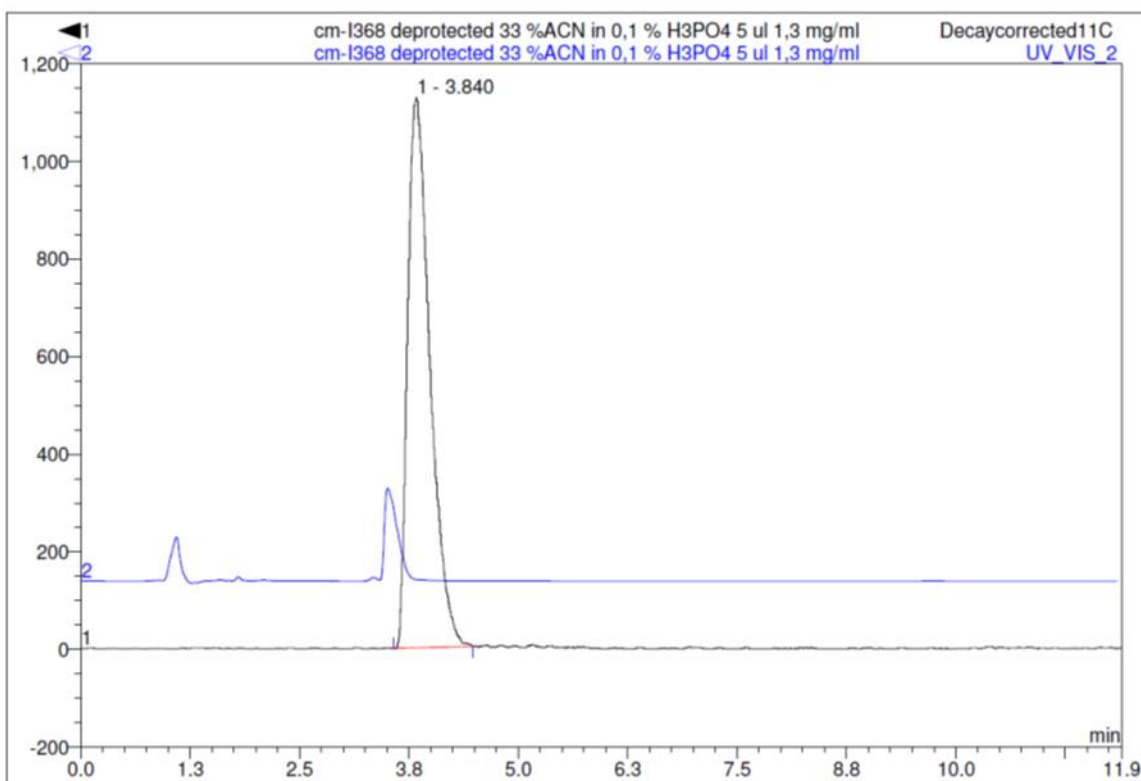

| No.           | Ret.Time min | Peak Name | Area *min | Rel.Area % | Amount | Type |
|---------------|--------------|-----------|-----------|------------|--------|------|
| 1             | 3.84         | n.a.      | 332.268   | 100.00     | n.a.   | BMB* |
| <b>Total:</b> |              |           | 1127.675  |            | 0.000  |      |

## [<sup>11</sup>C]2

2 (0.3 mg) was dissolved in 0.3 ml acetone and added 1 M NaOH (2 ul) and heated for 50 min at 60°C before reaction with [<sup>11</sup>C]MeOTf for 5 min at 40°C. Preparative cleaning as described. Analytical data as described for [<sup>18</sup>F]2, typical yield for 40 min irradiation was 600 MBq, As 1100 GBq/μmol.

## Copies of NMR spectra

### 2-(4-bromo-5-(fluoro)-2-methoxyphenyl)ethan-1-amine (9)

This report was created by ACD/NMR Processor Academic Edition. For more information go to [www.acdlabs.com/nmrproc/](http://www.acdlabs.com/nmrproc/)

26-04-2016 16:32:45

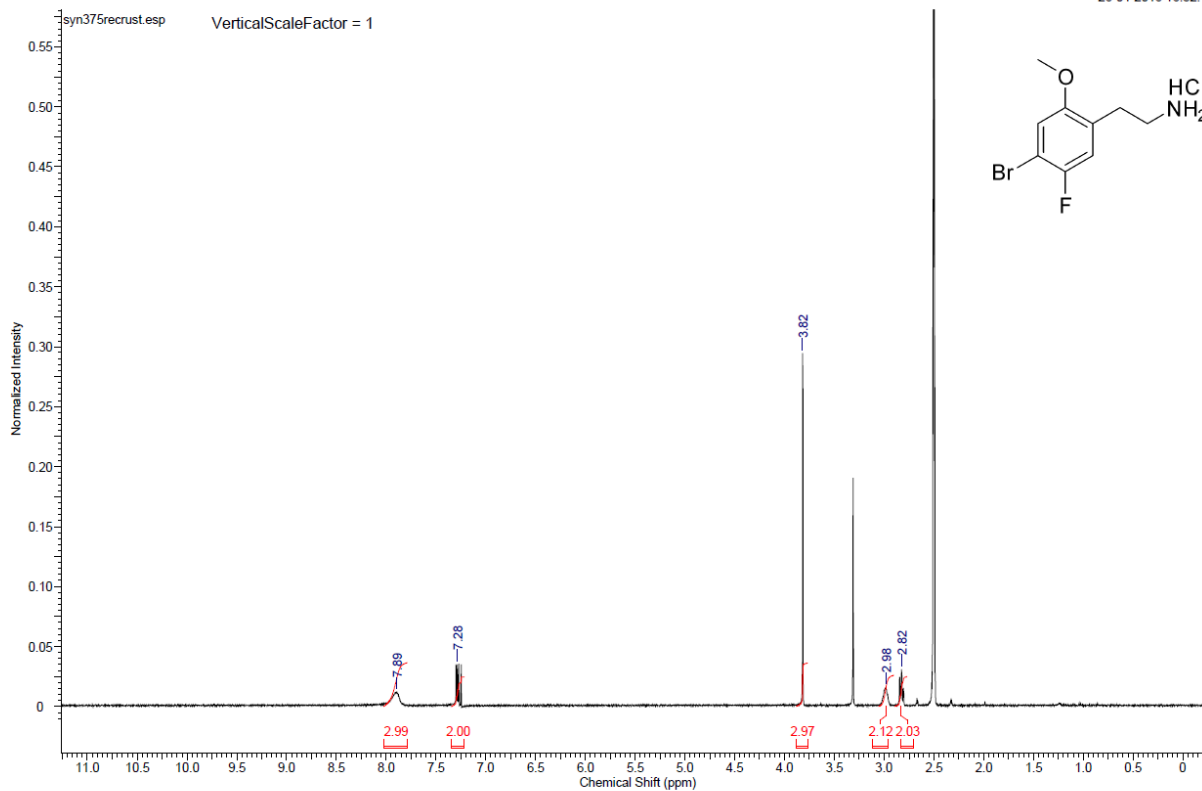

# 2-(4-bromo-5-(fluoro-18F)-2-methoxyphenyl)-N-(2-methoxybenzyl)ethan-1-amine (2)

This report was created by ACD/NMR Processor Academic Edition. For more information go to [www.acdlabs.com/nmrproc/](http://www.acdlabs.com/nmrproc/)

26-04-2016 16:52:45

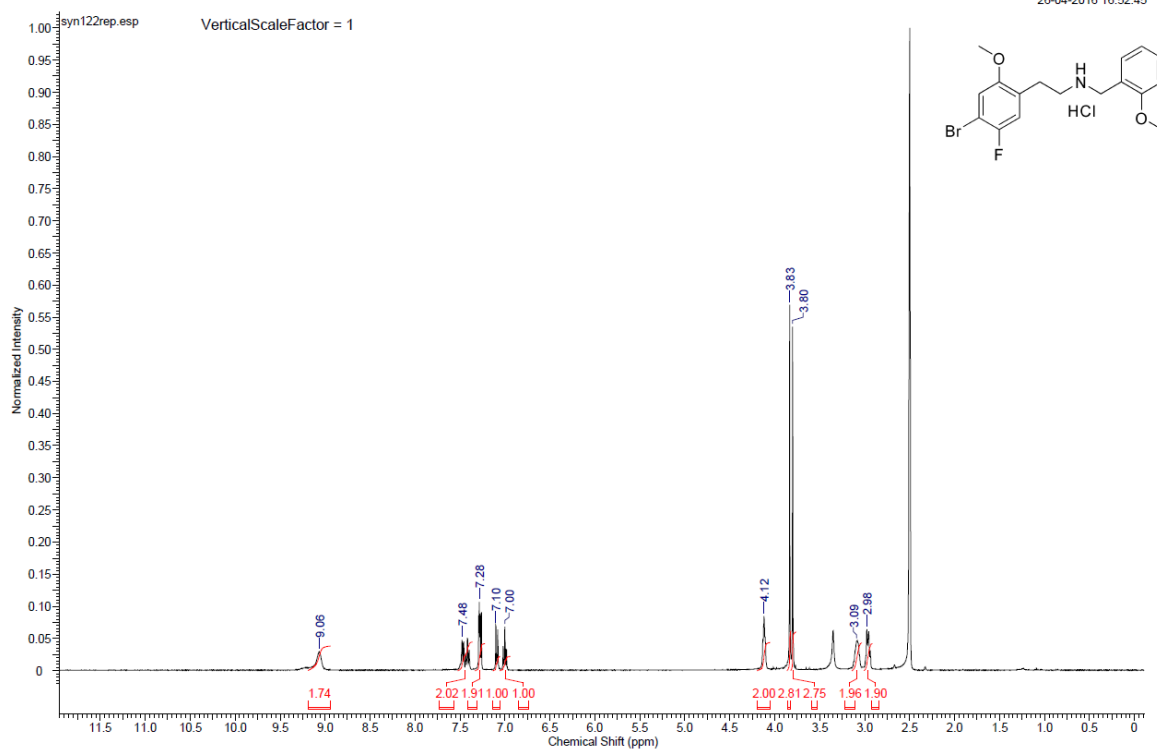

2-(((4-bromo-5-fluoro-2-methoxyphenethyl)amino)methyl)phenol hydrochloride (**3**)

This report was created by ACD/NMR Processor Academic Edition. For more information go to [www.acdlabs.com/nmrproc/](http://www.acdlabs.com/nmrproc/)

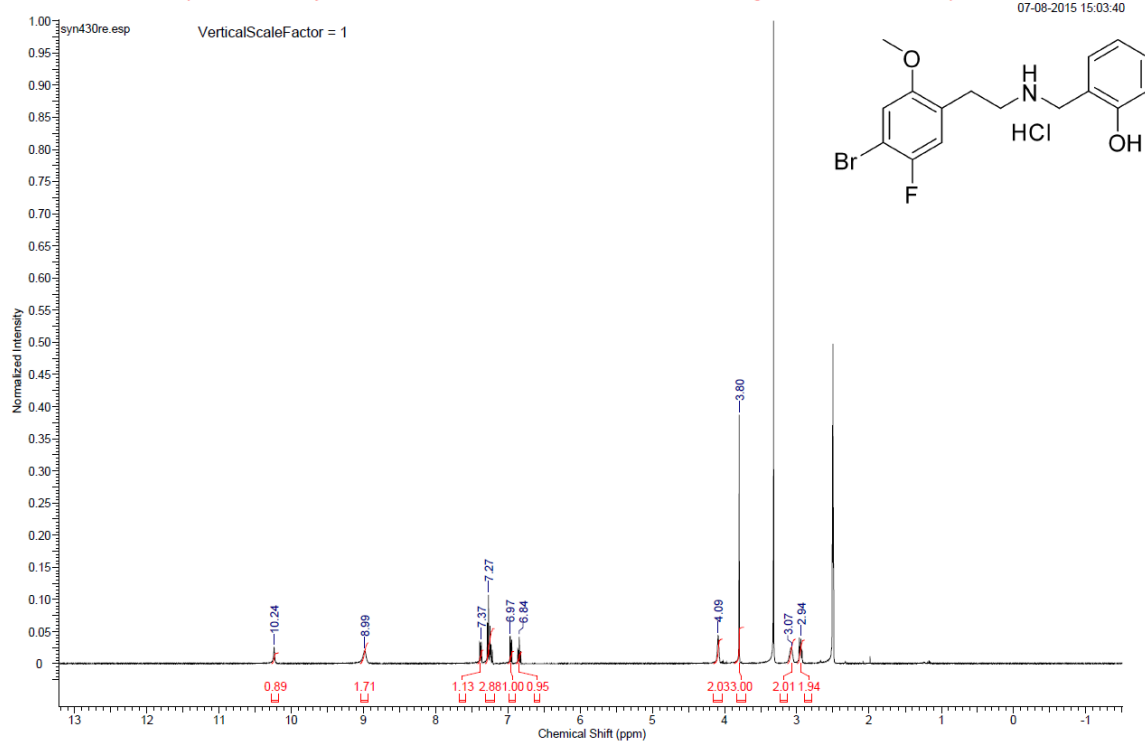

This report was created by ACD/NMR Processor Academic Edition. For more information go to [www.acdlabs.com/nmrproc/](http://www.acdlabs.com/nmrproc/)

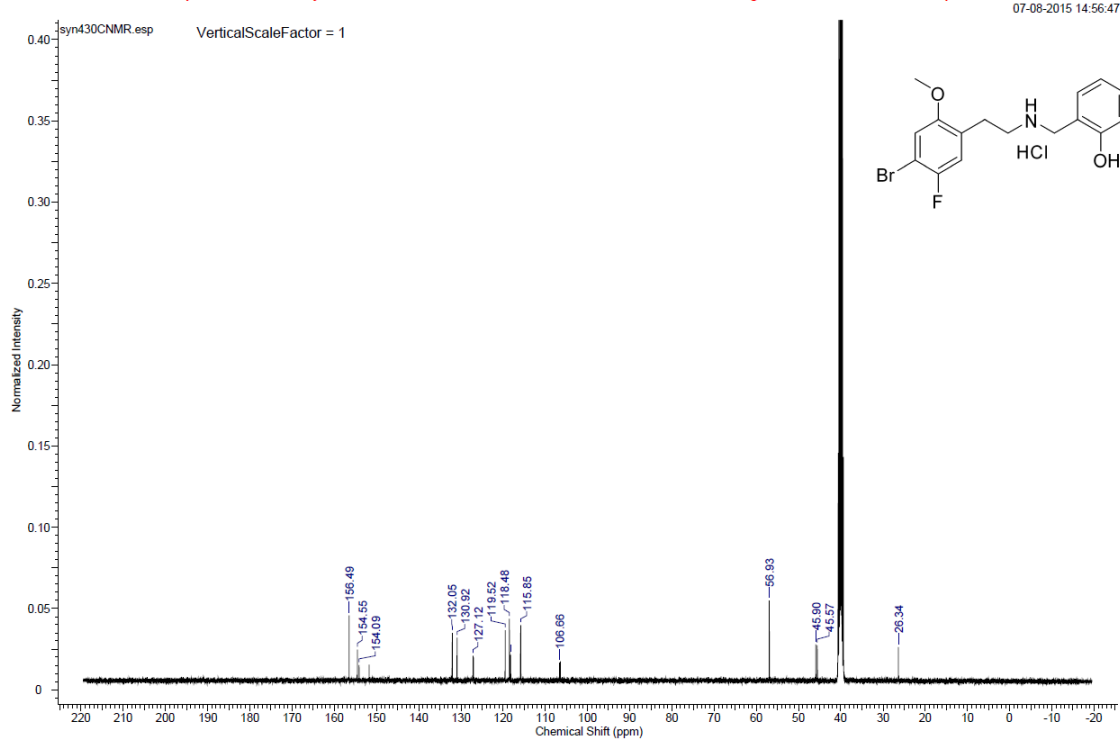

N-(benzo[d][1,3]dioxol-4-ylmethyl)-2-(4-bromo-5-fluoro-2-methoxyphenyl)ethan-1-aminehydrochloride (4)

This report was created by ACD/NMR Processor Academic Edition. For more information go to [www.acdlabs.com/nmrproc/](http://www.acdlabs.com/nmrproc/)

26-04-2016 17:04:44

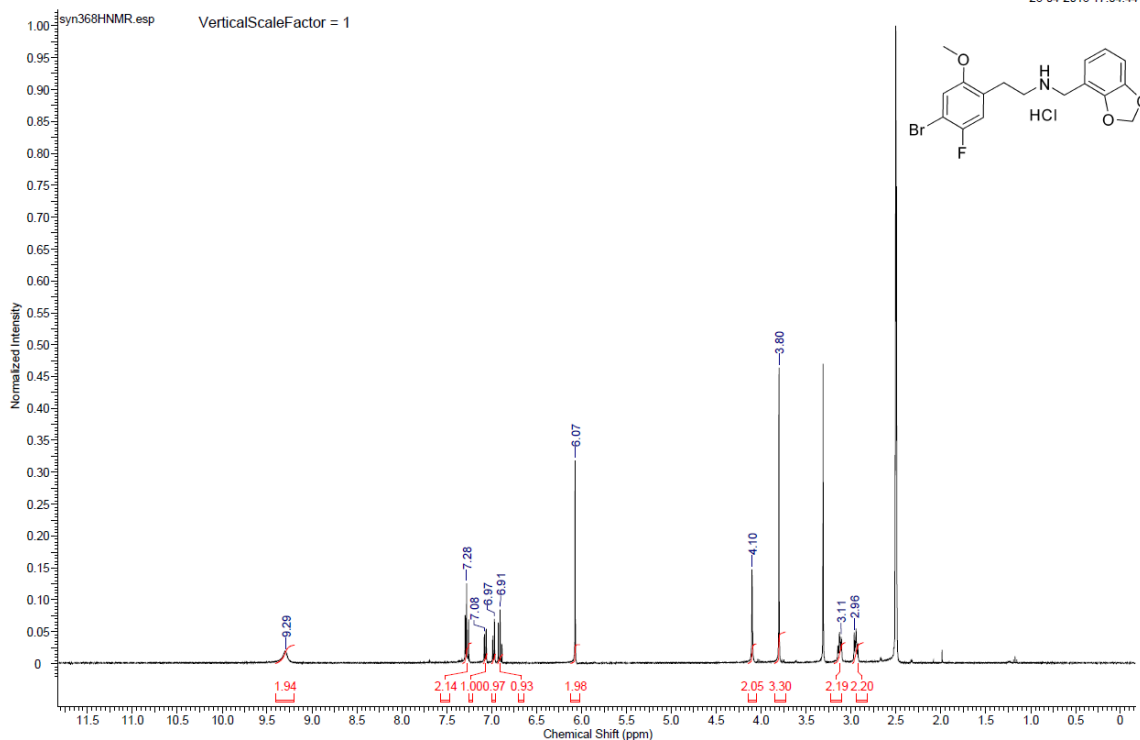

This report was created by ACD/NMR Processor Academic Edition. For more information go to [www.acdlabs.com/nmrproc/](http://www.acdlabs.com/nmrproc/)

07-08-2015 15:39:15

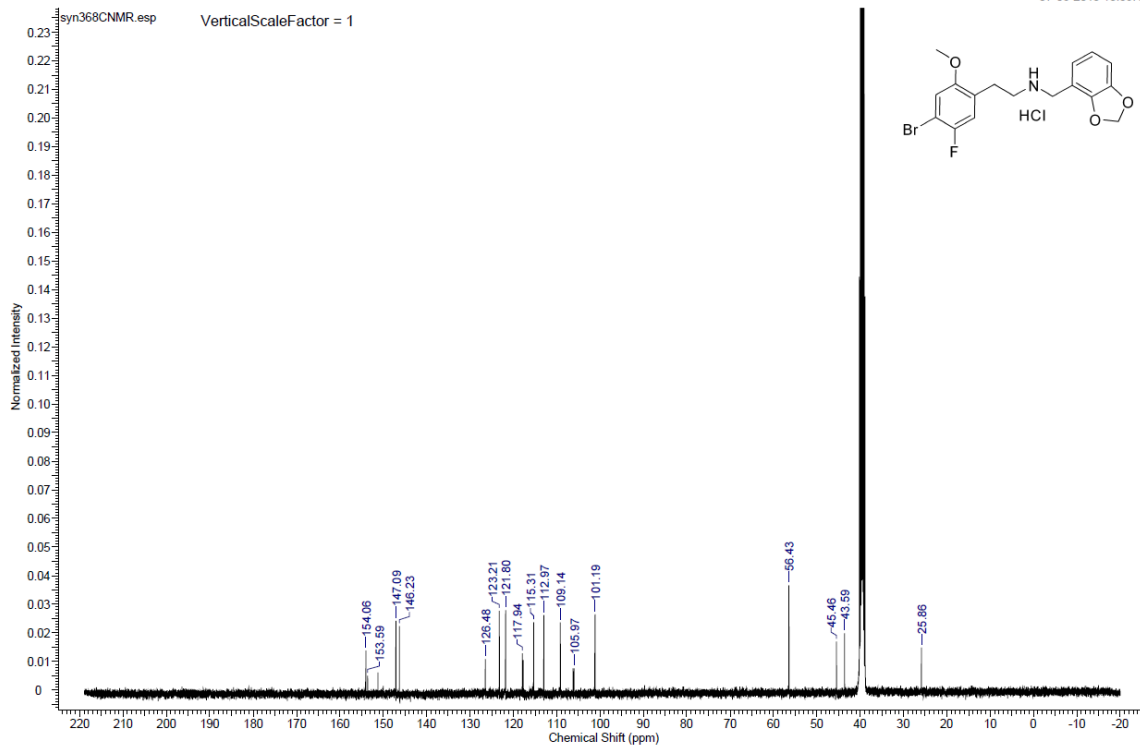

tert-butyl (4-bromo-5-iodo-2-methoxyphenethyl)carbamate (5)

This report was created by ACD/NMR Processor Academic Edition. For more information go to [www.acdlabs.com/nmrproc/](http://www.acdlabs.com/nmrproc/)

29-05-2016 12:35:09

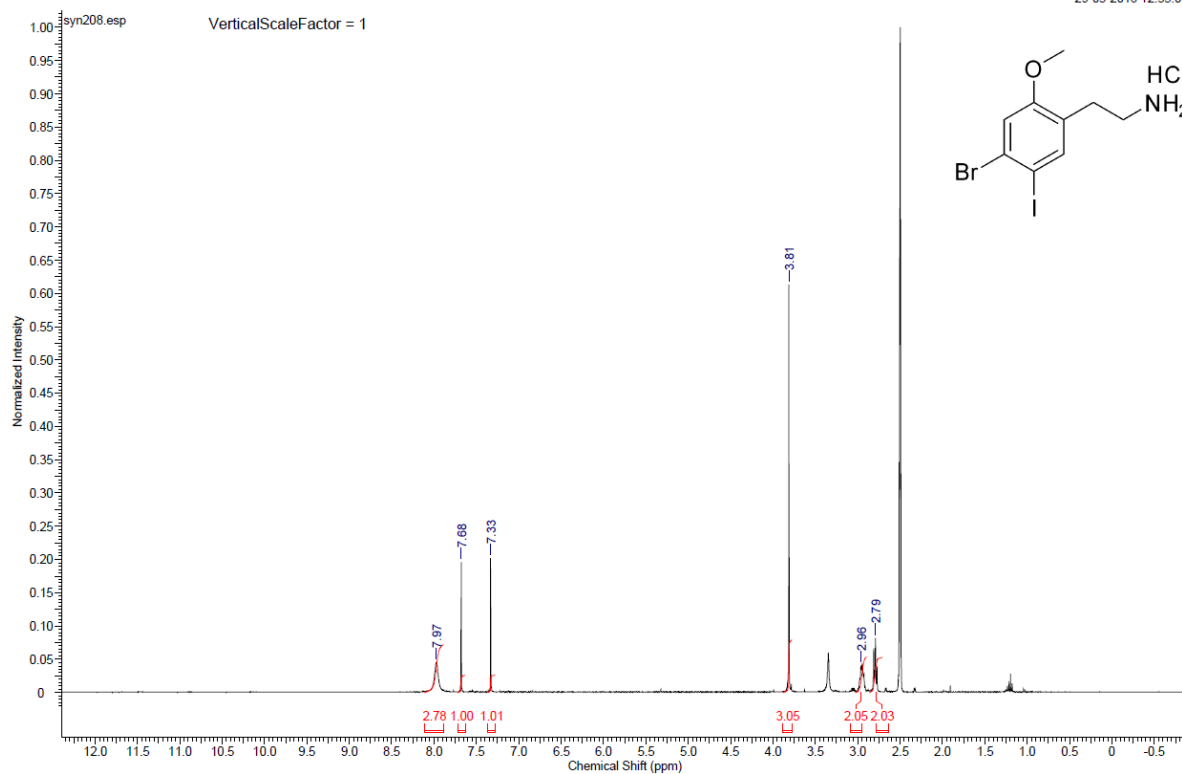



tert-butyl (4-bromo-2-methoxy-5-(trimethylstannyl)phenethyl)-carbamate (**5a**)

This report was created by ACD/NMR Processor Academic Edition. For more information go to [www.acdlabs.com/nmrproc/](http://www.acdlabs.com/nmrproc/)

29-05-2016 12:42:56

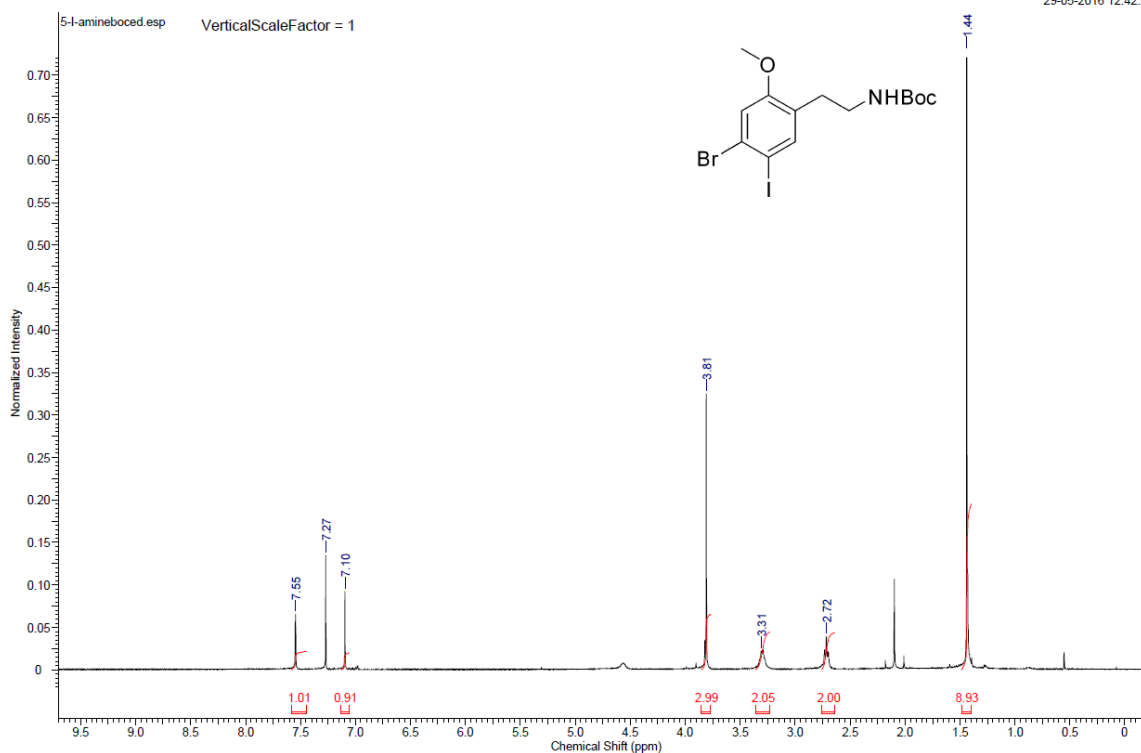

This report was created by ACD/NMR Processor Academic Edition. For more information go to [www.acdlabs.com/nmrproc/](http://www.acdlabs.com/nmrproc/)

30-09-2015 17:02:41

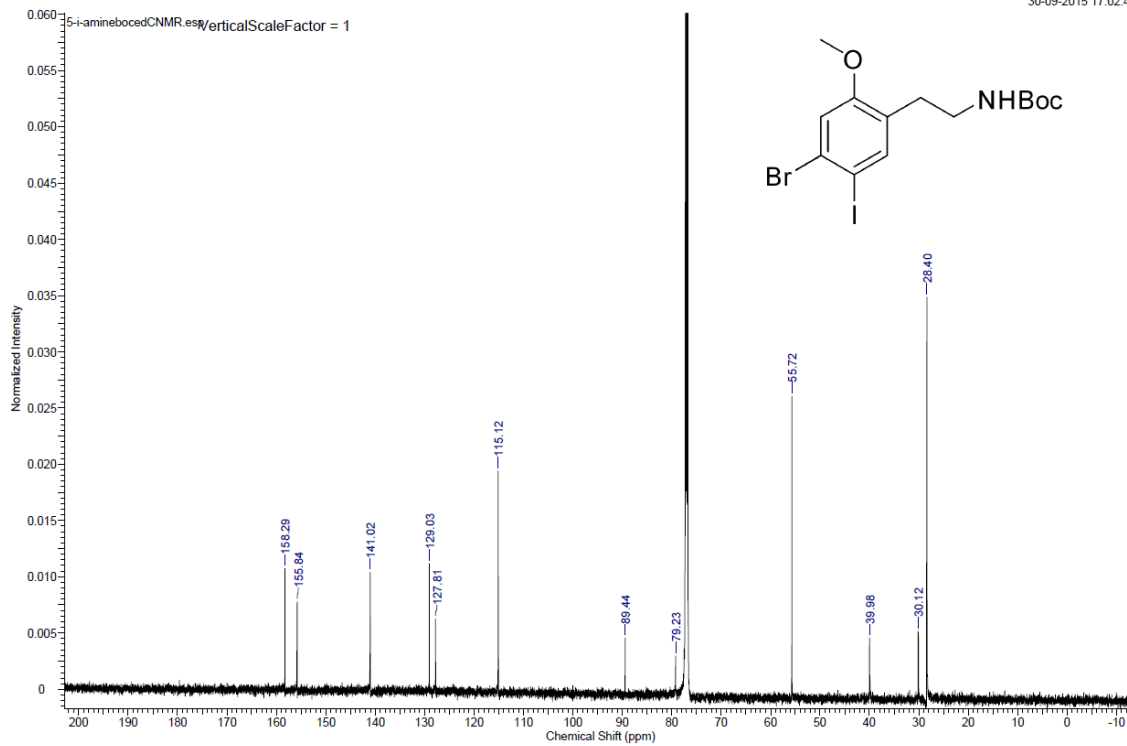

tert-butyl (4-bromo-2-methoxy-5-(trimethylstannyl)phenethyl)-carbamate (**5a**)

This report was created by ACD/NMR Processor Academic Edition. For more information go to [www.acdlabs.com/nmrproc/](http://www.acdlabs.com/nmrproc/)

29-05-2016 14:14:56

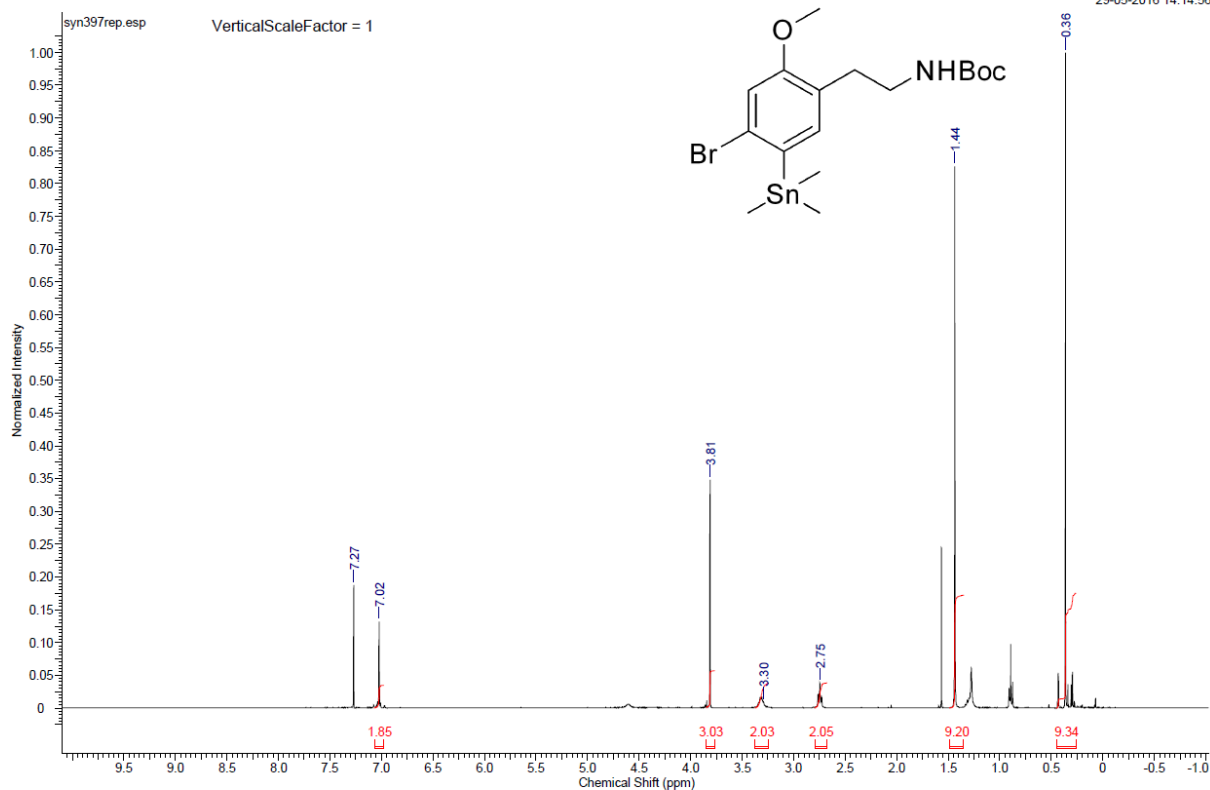

This report was created by ACD/NMR Processor Academic Edition. For more information go to [www.acdlabs.com/nmrproc/](http://www.acdlabs.com/nmrproc/)

30-09-2015 12:41:28

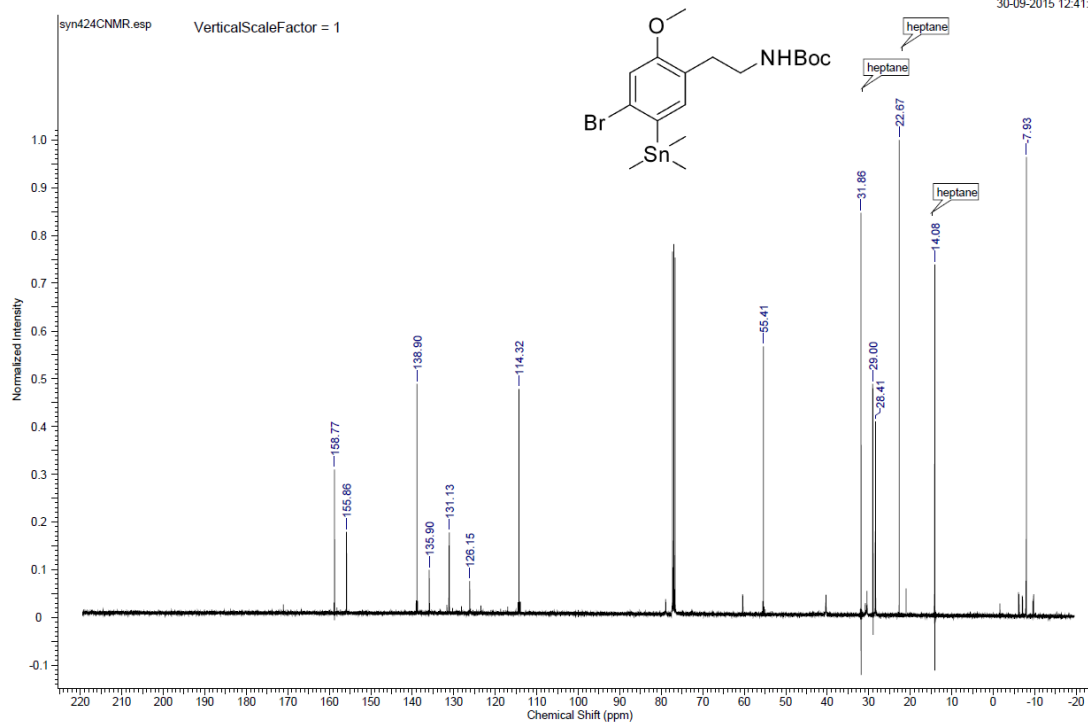

(2-bromo-5-(2-((tert-butoxycarbonyl)amino)ethyl)-4-methoxyphenyl)(thiophen-2-yl)iodonium bromide (6a)

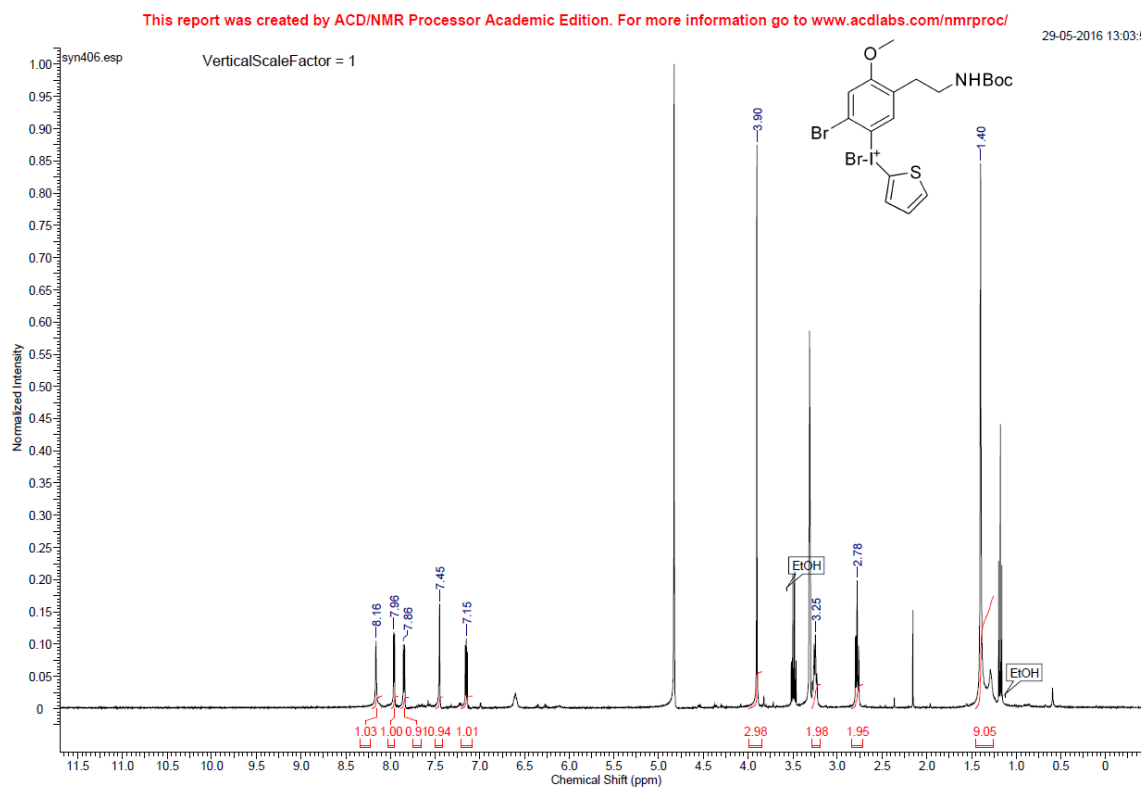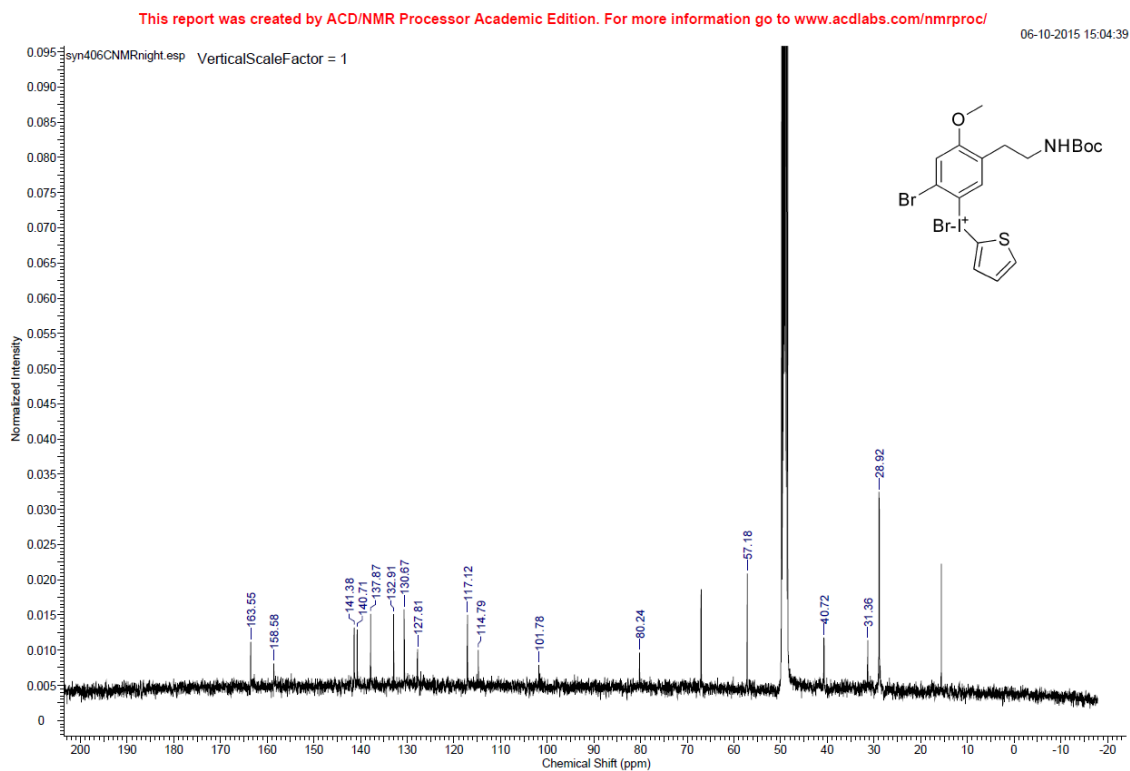

(2-bromo-5-(2-((tert-butoxycarbonyl)amino)ethyl)-4-methoxyphenyl)(thiophen-2-yl)iodonium triflate (**6b**)

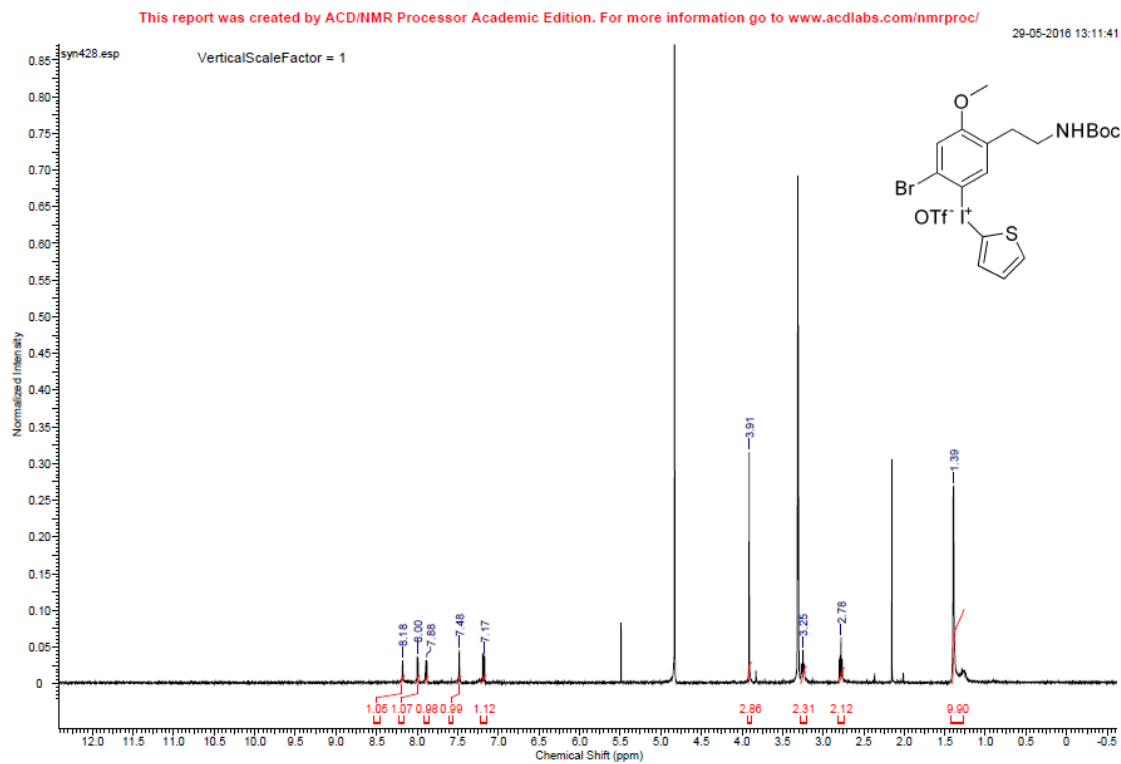

N-(benzo[d][1,3]dioxol-4-ylmethyl)-2-(4-bromo-5-iodo-2-methoxyphenyl)ethan-1-amine (**11a**)

This report was created by ACD/NMR Processor Academic Edition. For more information go to [www.acdlabs.com/nmrproc/](http://www.acdlabs.com/nmrproc/)

05-05-2016 14:27:03

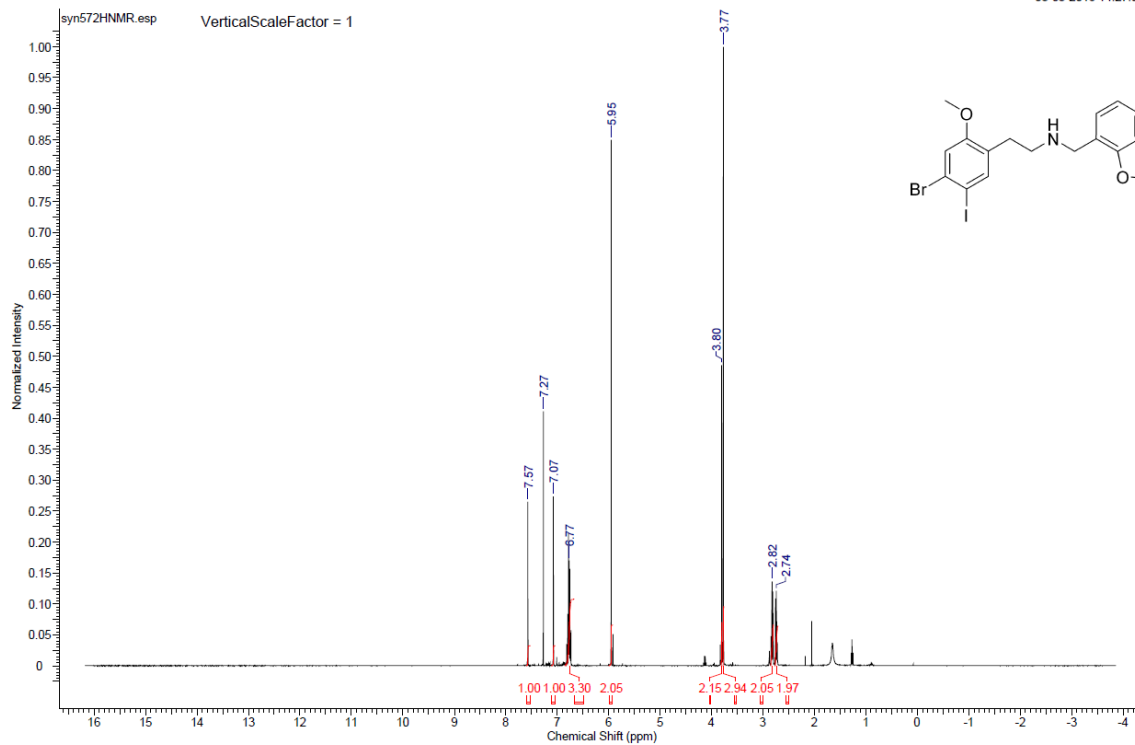

This report was created by ACD/NMR Processor Academic Edition. For more information go to [www.acdlabs.com/nmrproc/](http://www.acdlabs.com/nmrproc/)

10-04-2016 12:47:57

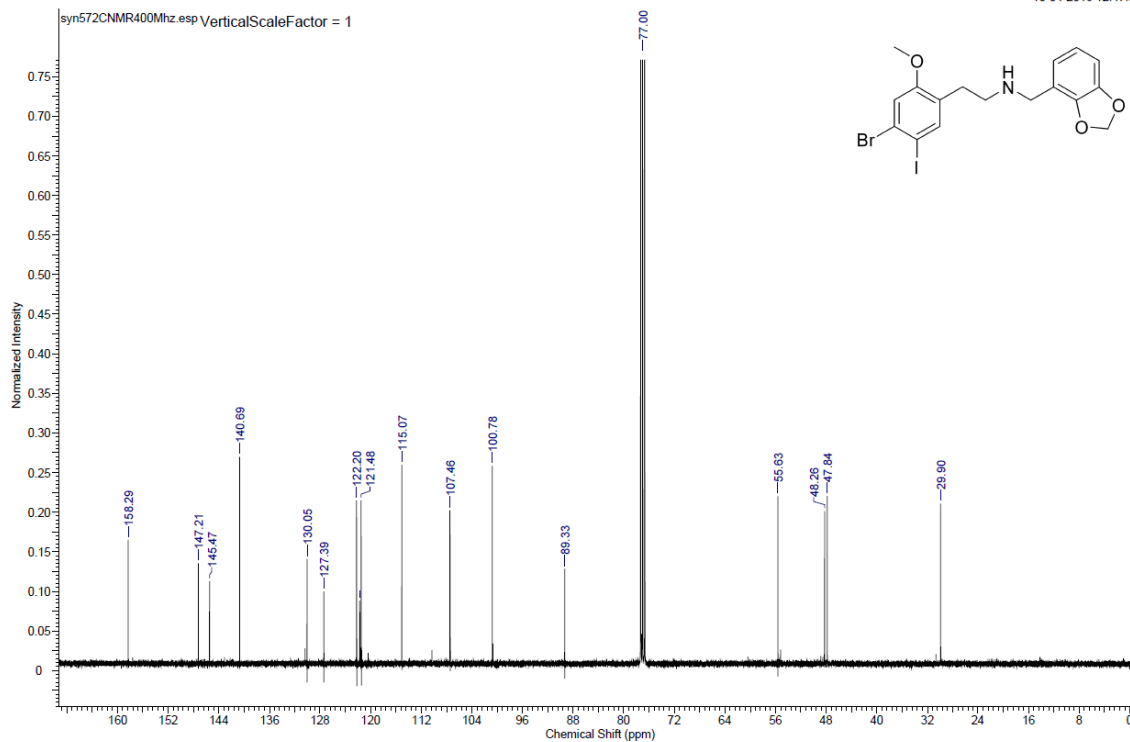

tert-butyl (benzo[d][1,3]dioxol-4-ylmethyl)(4-bromo-5-iodo-2-methoxyphenethyl)carbamate (**11**)

This report was created by ACD/NMR Processor Academic Edition. For more information go to [www.acdlabs.com/nmrproc/](http://www.acdlabs.com/nmrproc/)

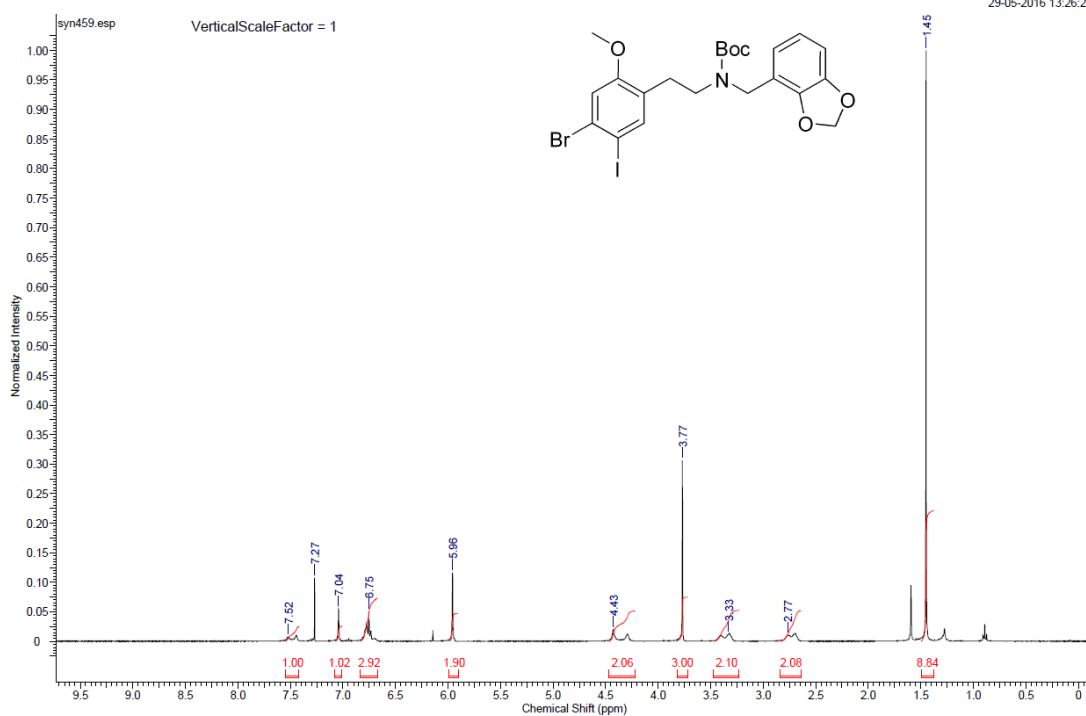

This report was created by ACD/NMR Processor Academic Edition. For more information go to [www.acdlabs.com/nmrproc/](http://www.acdlabs.com/nmrproc/)

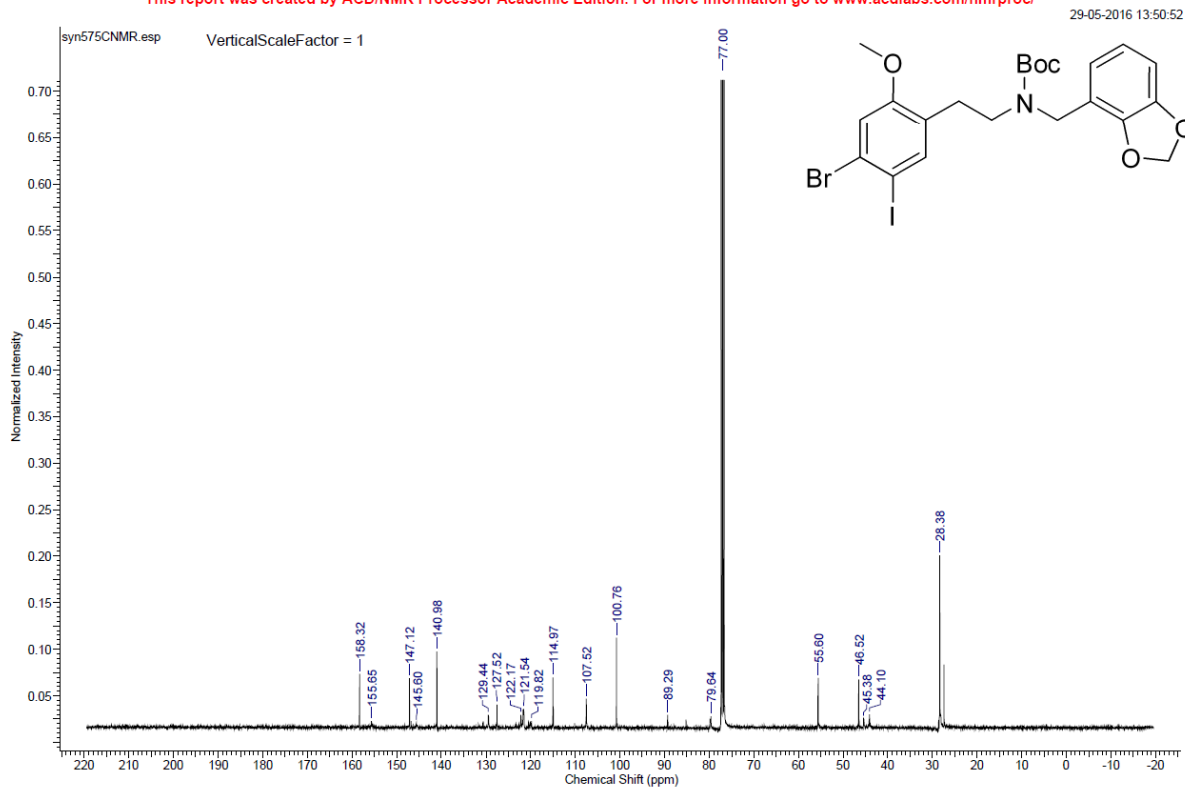

tert-butyl (4-bromo-5-((7,9-dioxo-6,10-dioxaspiro[4.5]decan-8-ylidene)-1,3-iodanyl)-2-methoxyphenethyl)carbamate(7)

This report was created by ACD/NMR Processor Academic Edition. For more information go to [www.acdlabs.com/nmrproc/](http://www.acdlabs.com/nmrproc/)

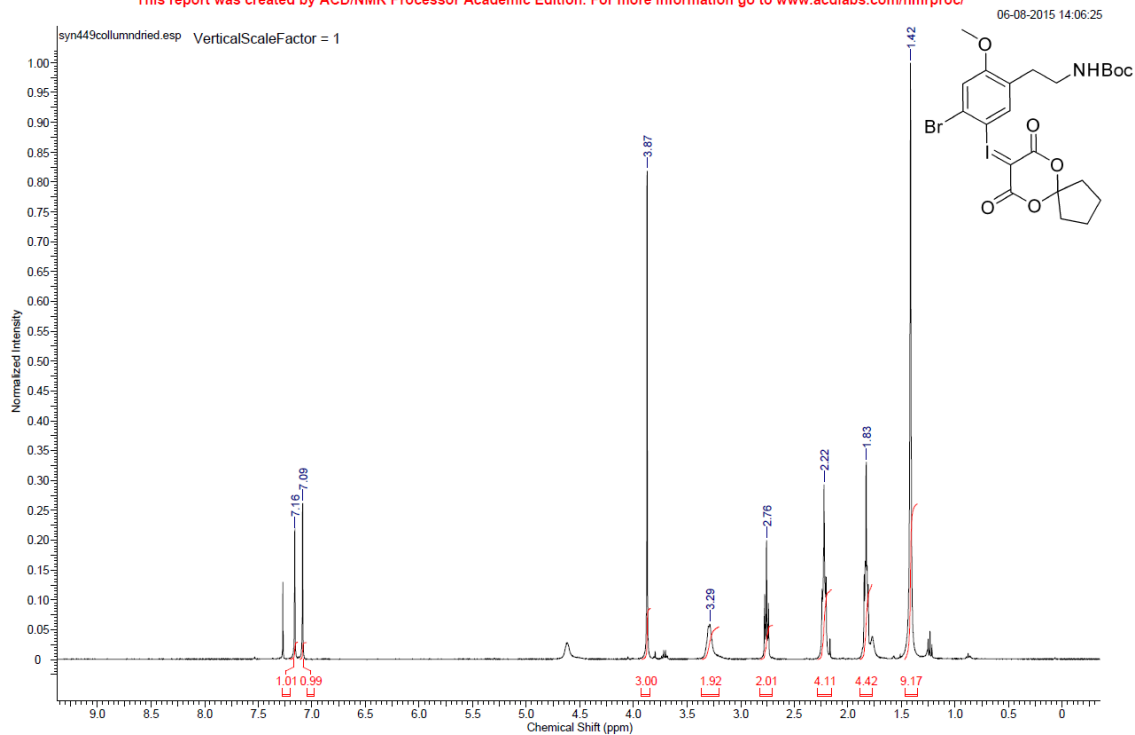

This report was created by ACD/NMR Processor Academic Edition. For more information go to [www.acdlabs.com/nmrproc/](http://www.acdlabs.com/nmrproc/)

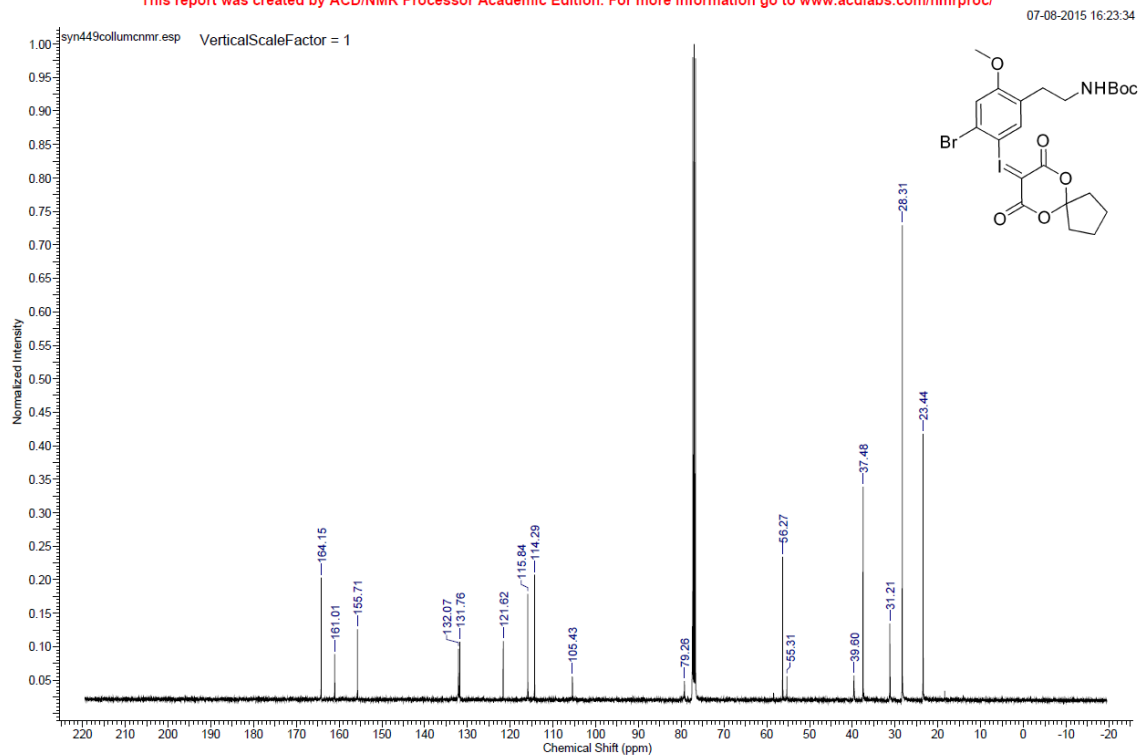

tert-butyl (benzo[d][1,3]dioxol-4-ylmethyl)(4-bromo-5-((7,9-dioxo-6,10-dioxaspiro[4.5]decan-8-ylidene)-13-iodanyl)-2-methoxyphenethyl)carbamate (**10**)

This report was created by ACD/NMR Processor Academic Edition. For more information go to [www.acdlabs.com/nmrproc/](http://www.acdlabs.com/nmrproc/)

29-05-2016 14:06:54

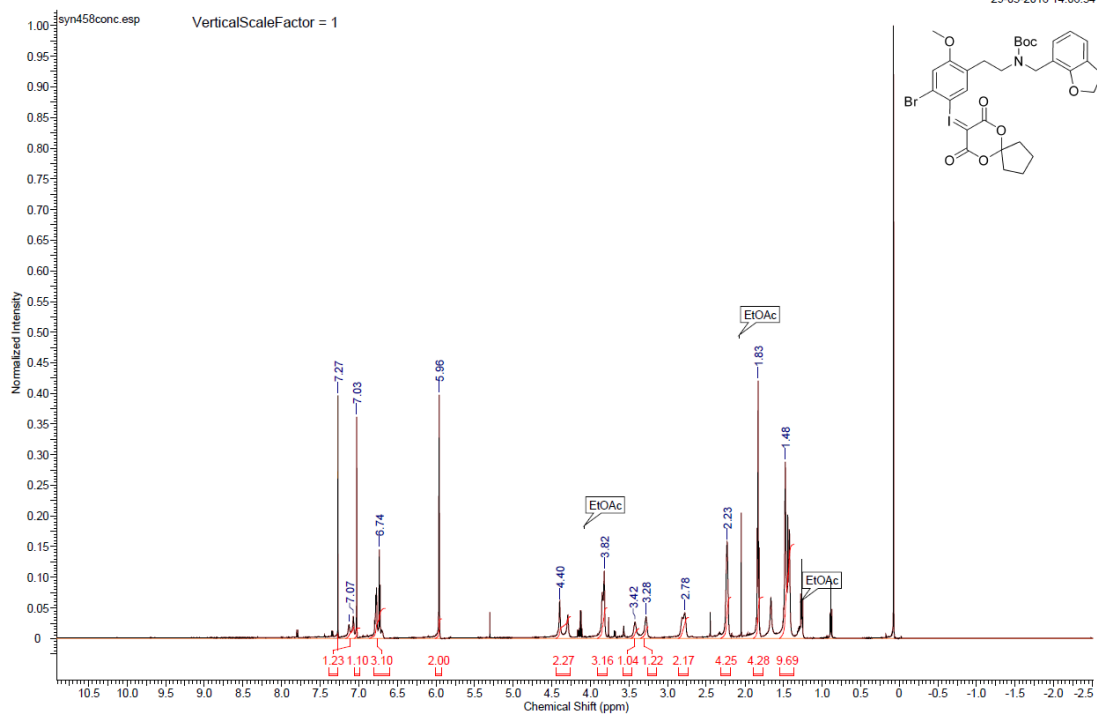

Supplement: c7ob00628d1.pdf [file c7ob00628d1.pdf]
